# Supplementary material
Source: PubMed Central journal article supplement (PMC3191050)

## SUPPLEMENTAL INFORMATION

### FIGURE LEGENDS

**Fig. S1. ARD1 genetically interacts with AGB1.** A. Stomatal index (SI) in Col-0, *agb1-2*, and 35S:SGB3 in *agb1-2* plants. *agb1-2* plants display an SI significantly higher than Col-0. SI is rescued by the overexpression of SGB3 in *agb1-2* plants. \*\*\*  $p < 0.0001$  B. Quantification of hypocotyl length and hook angle in plants overexpressing SGB3 in Col-0 as shown in Fig. 1D.

**Fig. S2. ARD1 is an aci-reductone dioxygenase protein.** A. Multiple sequence alignment of ARD proteins (ARATH, Arabidopsis; ORYSJ, rice; DROME, drosophila; ANOGA, mosquito; HUMAN, human; BOVIN, bovine; RAT, rat; MOUSE, mouse; XENLA, xenopus; CHICK, chicken; BRARE, fish; YEAS2, yeast; KLEP7, bacteria). Circled star indicates four conserved metal-binding residues. B. Homology model of ARD1 threaded into the crystal structure of MmADI1 (PDB ID 1VR3, homology model score = 0.74). Magenta and pink residues are identical and similar between the two, respectively, while cyan residues are plant-specific. The four metal-binding residues are navy, and the bound metal ion is red.

**Fig. S3. ARD1 and AGB1 expression.** A. ARD1 is localized in the cytoplasm of both wildtype and *agb1-2* *Arabidopsis* protoplasts. Bar = 10  $\mu\text{m}$ . Arrows indicate fluorescent regions surrounding the chloroplasts, confirming that ARD1 is localized in the cytoplasm. B. The anti-AGB1 antibody detects AGB1 in AGB1-infected Sf9 cells, but does not detect Sf9 G $\beta\gamma$  protein in uninfected Sf9 cells or those infected with an unrelated protein (infection control).

**Fig. S4. ARD1 enzymatic activity in the presence and absence of purified wildtype G $\beta\gamma$ .** A. Enzymatic activity (measured by the absorbance of the substrate at 305 nm) of ARD1 alone (ARD:G $\beta\gamma$  = 1:0) and in the presence of an increasing concentration of purified G $\beta\gamma$  protein (molar ratio indicated). B. The initial rate of the ARD1 enzyme from the graph shown in (A) +/- standard deviation in the presence of five different concentrations of G $\beta\gamma$ . The rates are expressed in moles of substrate per mole of enzyme per second +/- standard deviation and were recorded as initial rates. These rates account for the average oxygen-induced decay rate (baseline, see Experimental Procedures).

**Fig. S5. Plants contain four ARD proteins.** A. Multiple sequence alignment of the four *Arabidopsis* ARD proteins (red=ARD domain, underline = non-canonical NES, gray=putative metal binding residues). B. Phylogeny of metazoan ARD proteins generated in MrBayes. Diatom (Thalassiosira) served as an outgroup. Species indicated are as follows: ARATH, Arabidopsis; ORYSA, rice; DROME, drosophila; ANOGA, mosquito; HUMAN, human; BOVIN, bovine; RAT, rat; MOUSE, mouse; XENLA, xenopus; CHICK, chicken; BRARE, fish.

**Fig. S6. AGB1 and ARDs interact physically.** A. Growth of yeast strain AH109 containing the genes indicated (AtG $\beta 1\gamma 1$  alone or AtG $\beta 1\gamma 1$  + ARD2, ARD3, or ARD4) on yeast dropout media missing leucine, tryptophan, and histidine. This selects for a positive interaction between each of the two genes, resulting in no growth for the strain containing AtG $\beta 1\gamma 1$  alone and positive growth for the strains containing both AtG $\beta 1\gamma 1$  and one of the three ARDs. B. 6x-His-tagged G $\beta\gamma$  was pulled down with ARD-GST (ARD2, ARD3, or ARD4) on a glutathione resin and detected by immunoblotting with anti-AGB1. C. Bifluorescence molecular complementation in tobacco leaf epidermal cells. Bar = 20  $\mu\text{m}$ .

Table S1. **Primers used for PCR reactions.** Names of primers used for RT-PCR (Fig. 2) are denoted in parenthesis.

| <b>Name</b>        | <b>Purpose</b>                        | <b>Sequence 5'-3'</b>                 |
|--------------------|---------------------------------------|---------------------------------------|
| 4g14716 gtwfd1 (D) | ARD1 cDNA Gateway cloning forward     | CACCATgggTgAAgCggTCAAggATg            |
| 4g14716 rv2        | ARD1 reverse full-length              | CTAAgCCgAggCATTgATCATgAAg             |
| 4g14716 nostpfusrv | ARD1 reverse without stop codon       | AgCCgAggCATTgATCATgAAgTTATCgACATA     |
| ARD2 LP (C)        | ARD1 Internal reverse primer (exon 3) | TAACCACgAgATTCACggATC                 |
| ARD2+3 rt-F (B)    | ARD1 Internal forward primer (exon 4) | TgCCCggAAAAGCTTCCAAACTA               |
| ARD2 rt-R (A)      | ARD1 RT-PCR reverse primer            | AgCCgAggCATTgATCATgAAgT               |
| 4g14710 gtwfd      | ARD2 cDNA Gateway cloning forward     | CACCATgggTgAAgTggTTAAggATg            |
| 4g14710 rv2        | ARD2 reverse full-length              | CTAggCTgACgCgTCTATgACACCA             |
| 4g14710 rvnostp    | ARD2 reverse without stop codon       | ggCTgACgCgTCTATgACACCACCT             |
| 2g26400 gtwfd      | ARD3 cDNA Gateway cloning forward     | CACCATgggTgAAgCCgCTAAggATC            |
| 2g26400 rv2        | ARD3 reverse full-length              | TTACgCTgAAgCgTCTATgTTACgg             |
| 2g26400 rvnostp    | ARD3 reverse without stop codon       | CgCTgAAgCgTCTATgTTACgggTCC            |
| 5g43850 gtwfd      | ARD4 cDNA Gateway cloning forward     | CACCATggCTCTCgAggCATggTTTA            |
| 5g43850 rv2        | ARD4 reverse full-length              | TTAATgTgCTTTAACggTTTCTCCAAA<br>CTT    |
| 5g43850 rvnostp    | ARD4 reverse without stop codon       | ATgTgCTTTAACggTTTCTCCAAACTTg<br>TAggT |

Fig S1

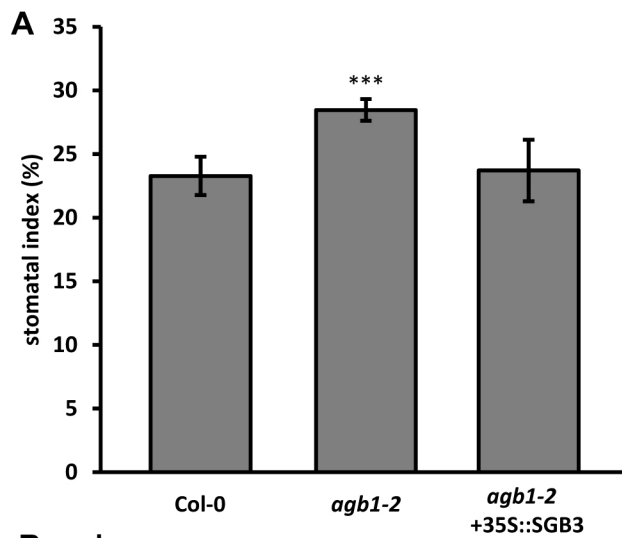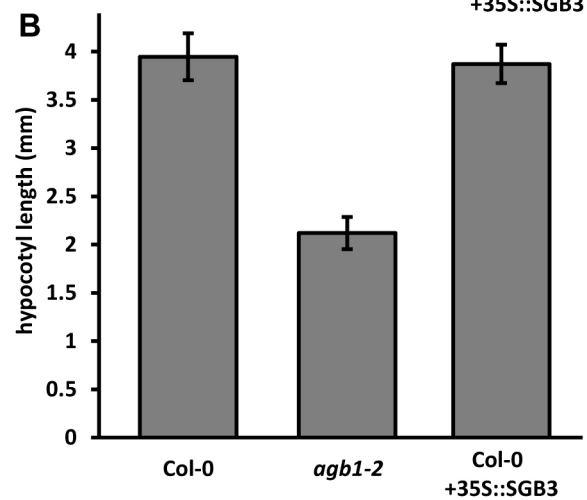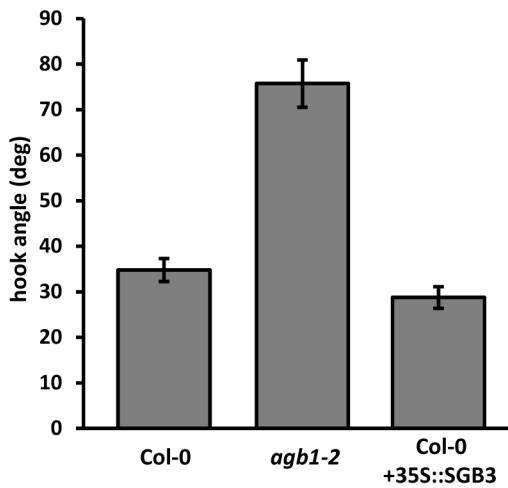

Fig S2

A

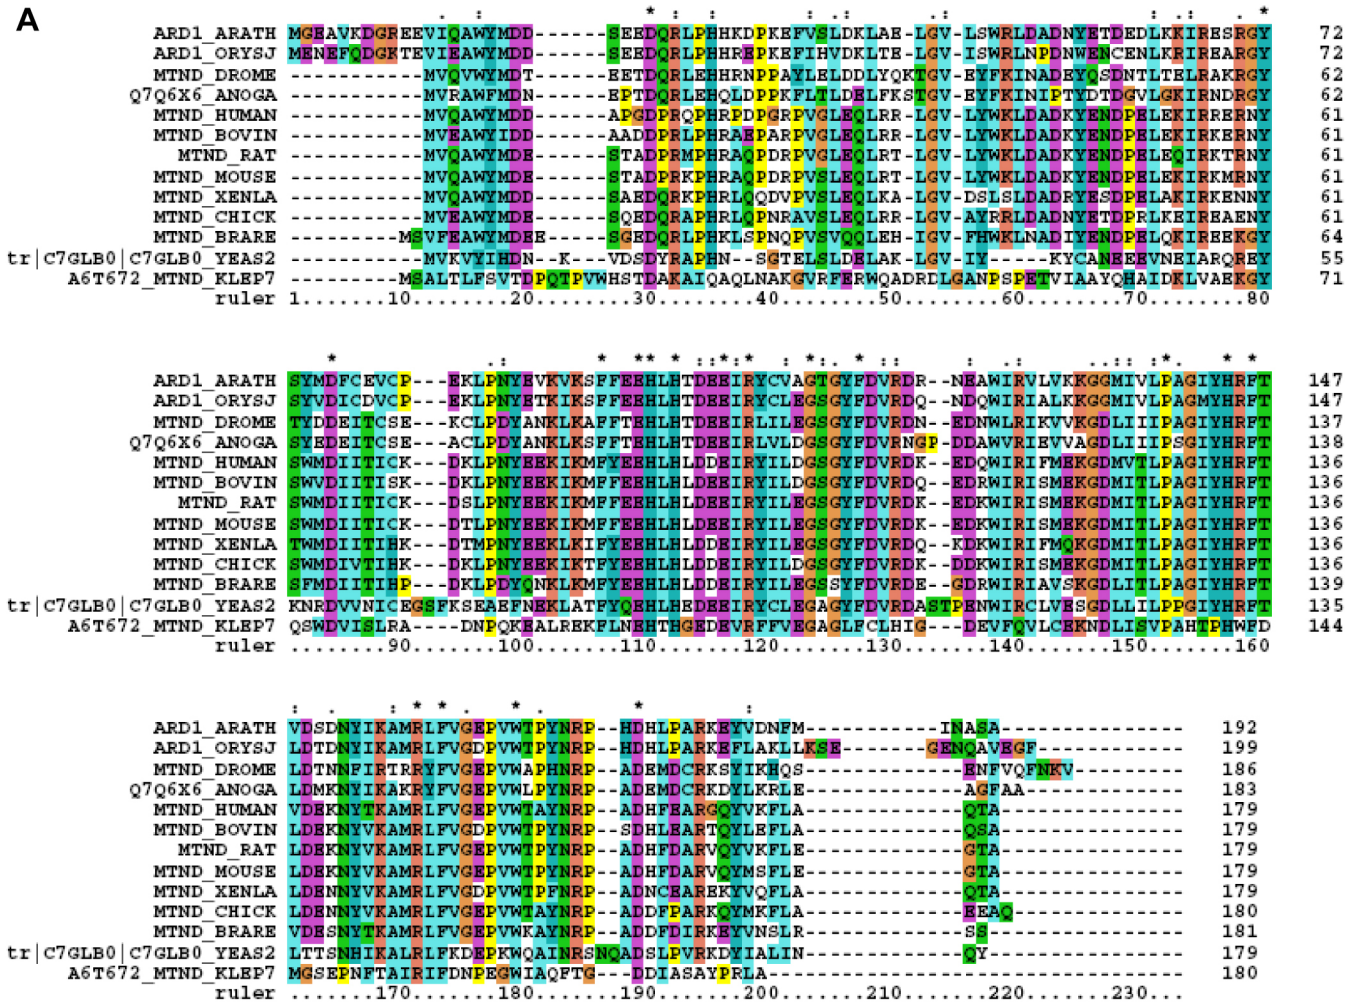

B

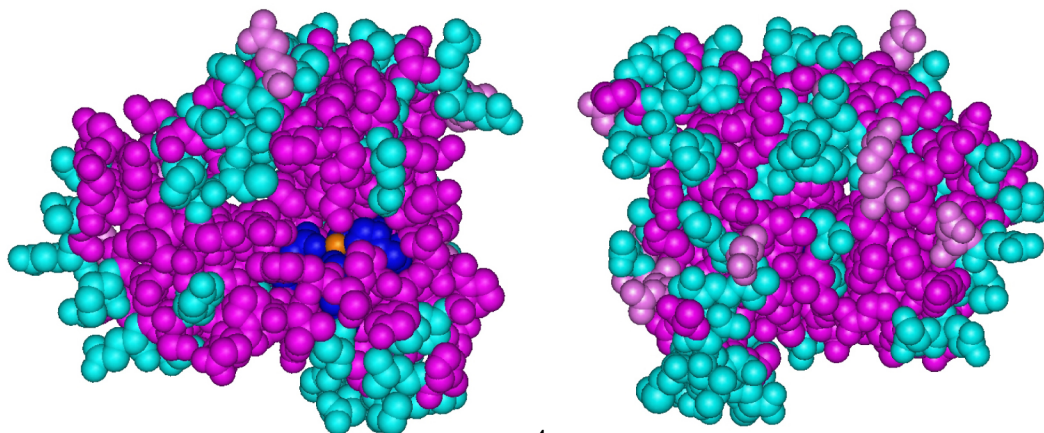

Fig S3

**A**

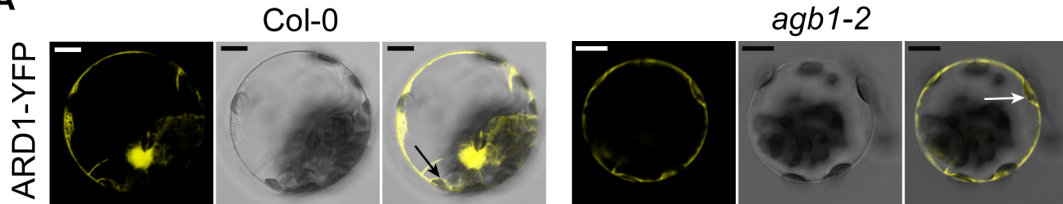

**B**

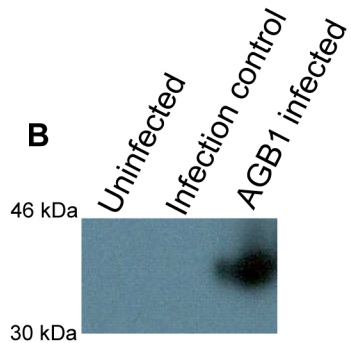

Fig S4

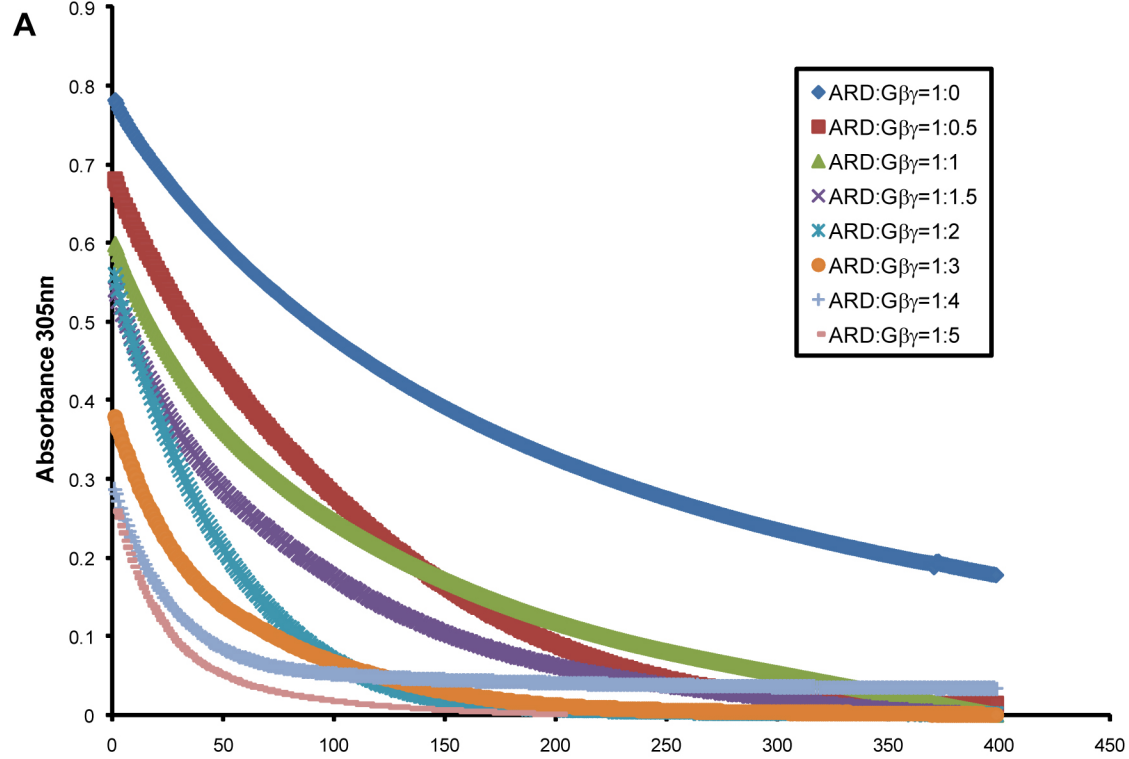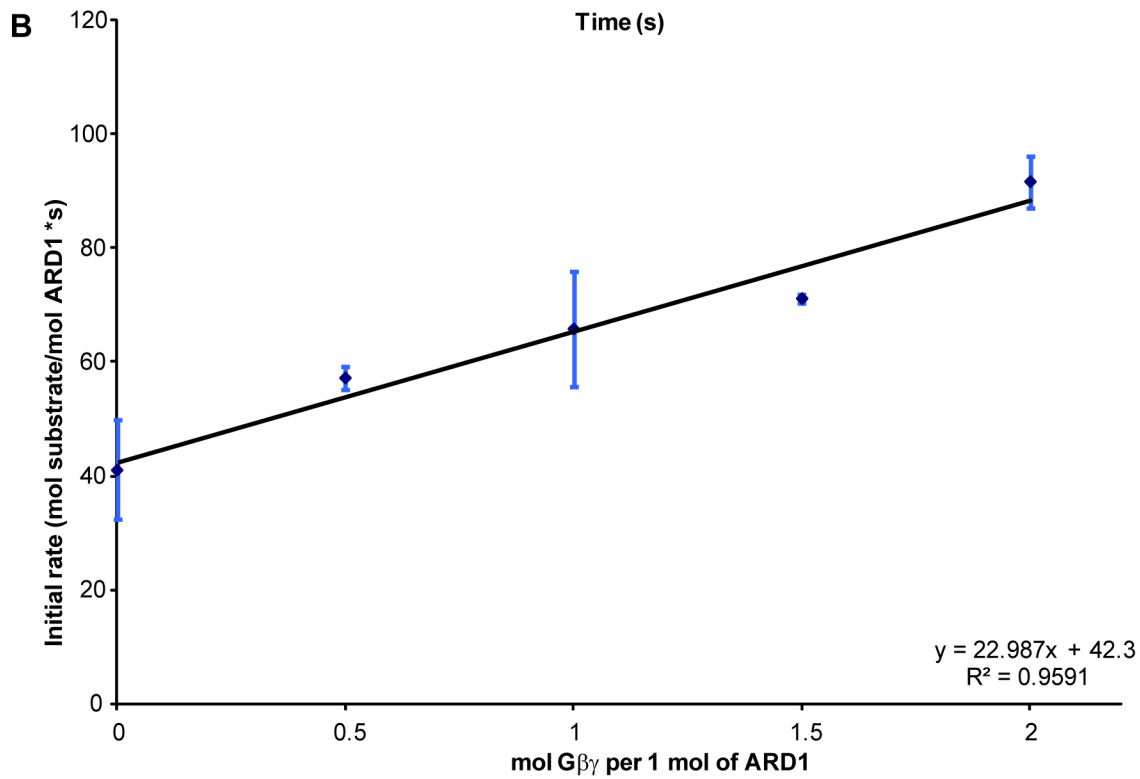

Fig S5

**A**

```

ARD1      MGEAVKDGREEVIQAWYMD DSEEDQRLPHHKDPKEFVSLDKLAE LGVLSWRLDADNYETD 60
ARD3      MGEAAKDQTEEVIQAWYLDNKEEDQKLP HHKDPKEFVSLDKLAE LGVLCWRLDADNYETD 60
ARD2      MGEVVKDGREEVIQAWYMD DSEEDQRLPHHKDPKEFSLDKLAE LGVLSWRLDADNYETD 60
ARD4      -----MALEAWFMDDSNE DQRLPHHRNPKELVSLDYLAELGVLYWKLNPENYEND 50
           .:.*:.*:.*:.*:.*:.*:.*:.*:.*:.*:.*:.*:.*:.*:.*:.*:.*:.*:.*:.*:.*:.*:
           .:.*:.*:.*:.*:.*:.*:.*:.*:.*:.*:.*:.*:.*:.*:.*:.*:.*:.*:.*:.*:.*:.*

ARD1      EDLKKIRESRGYSYMD FCEVCPEKLP NYEVKVKSFEEHLHTDEEIRYCVAGTGYFDVRD 120
ARD3      EELKRIRESRGYSYMD LCEVCPEKLP NYEEKVKMFFEEHLHIDE EIRYCLAGSGYFDVRD 120
ARD2      EDLKKIRESRGYSYMD FCEVCPEKLP NYEVKVKSFEEHLHTDEEIRYCVAGSGYFDVRD 120
ARD4      SELSKIREDRGYDYMD LLDLCPEKVS NYEEKLKNFFTEH IHKDEEIRYCLAGSGYFDVRD 110
           .:.*:.*:.*:.*:.*:.*:.*:.*:.*:.*:.*:.*:.*:.*:.*:.*:.*:.*:.*:.*:.*:.*
           .:.*:.*:.*:.*:.*:.*:.*:.*:.*:.*:.*:.*:.*:.*:.*:.*:.*:.*:.*:.*:.*

ARD1      RNEAWIRVLVKKGGMIVLPAGIYHRFTVDS DNYIKAMRLFVGE PVWTPYNRPHDHL PARK 180
ARD3      LNDIWIRVWVKKGGLIVFPAGIYHRFTVDS DNYMKAMRLFVGGPVWTA YNRPHDHL PARK 180
ARD2      RNEAWIRVWVKKGGMIVLPAGIYHRFTVDS DNYIKAMRLFVGE PVWTPYNRPHDHL PARK 180
ARD4      KDDRWIRIWMQPGDLIVLPAGIYHRFTLDAS NYIKLMRLFVGE PVWTPYNRPQEEHPVRK 170
           .:.*:.*:.*:.*:.*:.*:.*:.*:.*:.*:.*:.*:.*:.*:.*:.*:.*:.*:.*:.*:.*:.*
           .:.*:.*:.*:.*:.*:.*:.*:.*:.*:.*:.*:.*:.*:.*:.*:.*:.*:.*:.*:.*:.*

ARD1      EYVDNFMINASA----- 192
ARD3      AYMKKFLKVI GDRNIDASA 199
ARD2      EYIDNFVKVNEGGVIDASA 199
ARD4      KYIHGLTYKFGETVKAH-- 187
           *:.*:
    
```

**B**

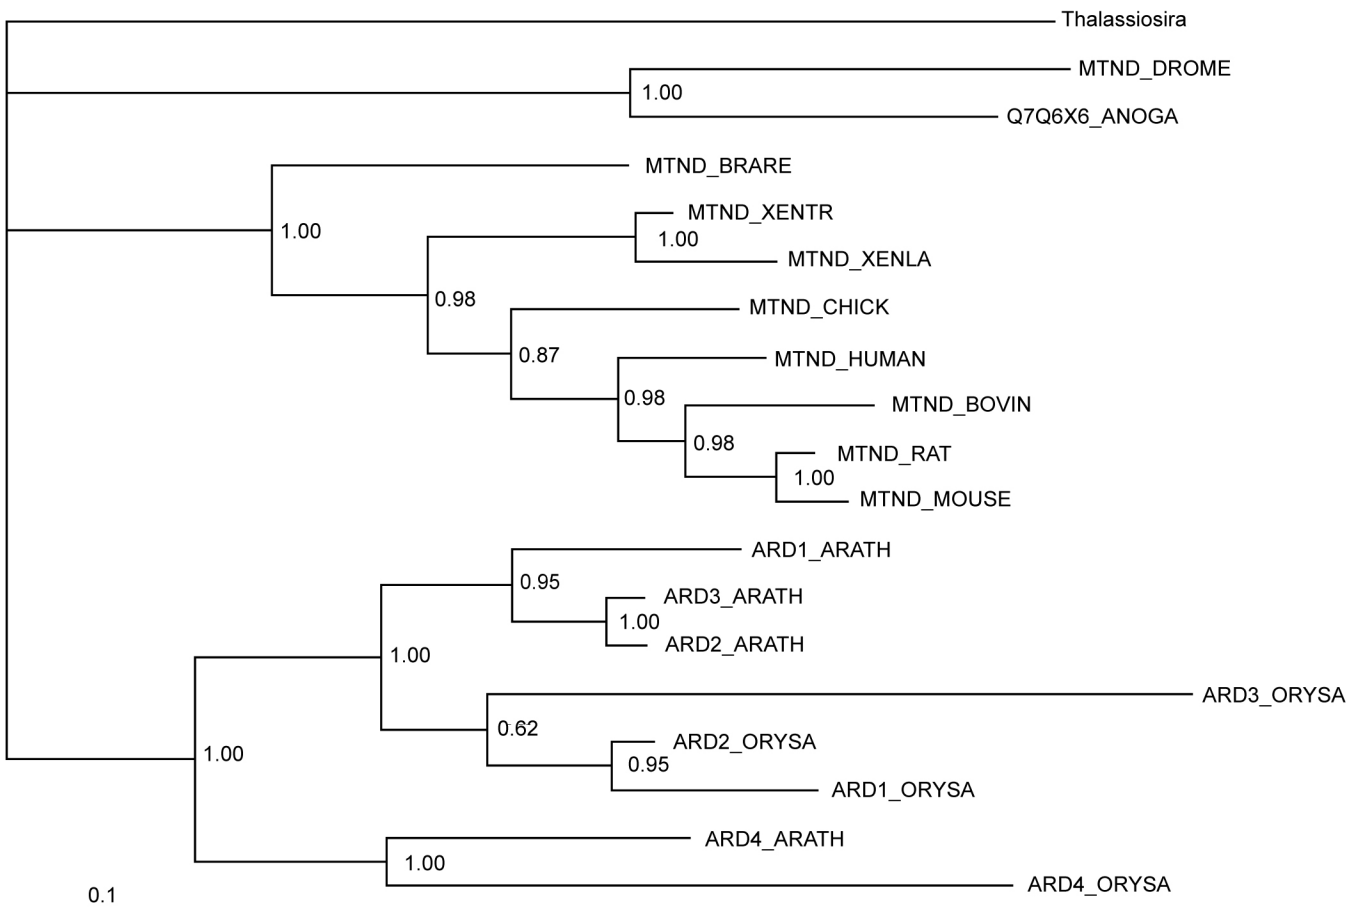

Figure S6

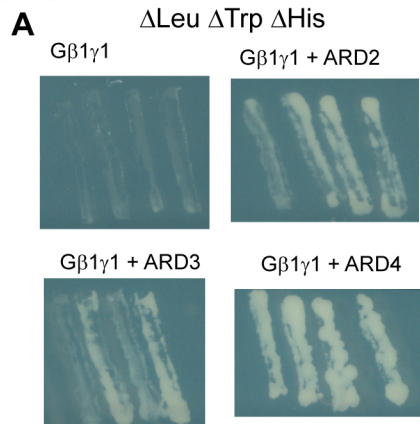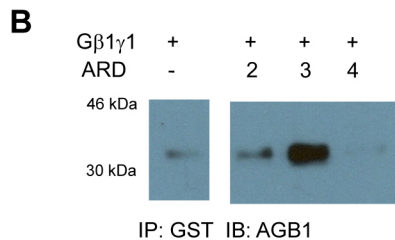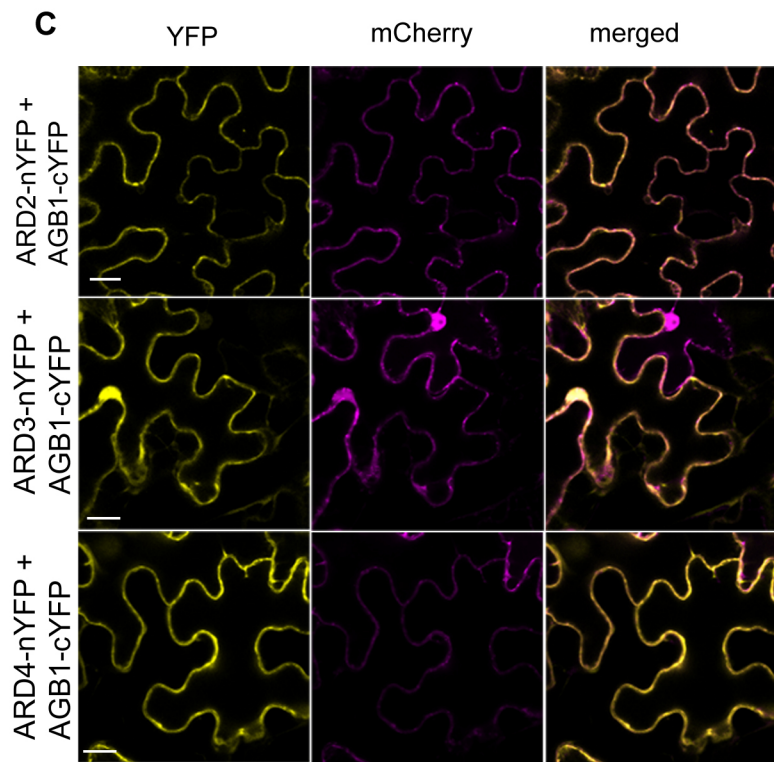

Supplement: supp_M111.227256_jbc.M111.227256-1.pdf [file supp_M111.227256_jbc.M111.227256-1.pdf]
